# Supplementary material for: Concentric and Eccentric Pedaling-Type Interval Exercise on a Soft Robot for Stable Coronary Artery Disease Patients: Toward a Personalized Protocol
Source: PubMed Central journal article supplement (PMC6456820; doi:10.2196/10970), 2019-03-27
Supplement: resprot_v8i3e10970_app1.pdf [file resprot_v8i3e10970_app1.pdf]

**Table 1:** Cardiorespiratory parameters pre and post training for the patient, which followed the CON and ECC protocol, respectively.

|          | VO2peak [mL*min <sup>-1</sup> ] | VO2peak [mL*min <sup>-1</sup> *min <sup>-1</sup> ] | Ppeak [W] | HRpeak [min <sup>-1</sup> ] | Sys BPpeak [mmHg] | Dia BPpeak [mmHg] | BLpeak [mM] |
|----------|---------------------------------|----------------------------------------------------|-----------|-----------------------------|-------------------|-------------------|-------------|
| CON pre  | 1.94                            | 20.89                                              | 150.00    | 111.00                      | 179.00            | 89.00             | 8.22        |
| CON post | 2.42                            | 26.03                                              | 180.00    | 142.00                      | 214.00            | 100.00            | 10.17       |
| ECC pre  | 3.16                            | 29.06                                              | 250.00    | 139.00                      | 216.00            | 96.00             | 10.83       |
| ECC post | 2.94                            | 27.22                                              | 250.00    | 136.00                      | 225.00            | 81.00             | 9.87        |
