# Supplementary material for: Concentric and Eccentric Pedaling-Type Interval Exercise on a Soft Robot for Stable Coronary Artery Disease Patients: Toward a Personalized Protocol
Source: PubMed Central journal article supplement (PMC6456820; doi:10.2196/10970), 2019-03-27
Supplement: resprot_v8i3e10970_app2.pdf [file resprot_v8i3e10970_app2.pdf]

**Table 2:** Parameters of muscle oxygen saturation (SmO2) pre and post training for the patient, which followed the CON and ECC protocol, respectively.

|             | SmO2<br>baseline | SmO2<br>min | delta<br>deoxygenation | t<br>deoxygenation | slope<br>deoxygenation | SmO2<br>max | delta1/2<br>reoxygenation | SmO2<br>overshoot | t1/2<br>reoxygenation | slope1/2<br>reoxygenation |      |
|-------------|------------------|-------------|------------------------|--------------------|------------------------|-------------|---------------------------|-------------------|-----------------------|---------------------------|------|
| CON<br>pre  | 43.33            | 36.45       | -6.88                  | 500.00             | -0.01                  | 80.00       | 43.55                     | 36.67             | 30.00                 |                           | 0.73 |
| CON<br>post | 48.91            | 24.97       | -23.94                 | 612.00             | -0.04                  | 74.61       | 49.64                     | 25.70             | 46.00                 |                           | 0.54 |
| ECC pre     | 39.16            | 29.67       | -9.49                  | 914.00             | -0.01                  | 74.39       | 44.72                     | 35.23             | 34.00                 |                           | 0.66 |
| ECC<br>post | 41.15            | 27.05       | -14.10                 | 888.00             | -0.02                  | 79.62       | 52.57                     | 38.47             | 44.00                 |                           | 0.60 |
