# Supplementary material for: Concentric and Eccentric Pedaling-Type Interval Exercise on a Soft Robot for Stable Coronary Artery Disease Patients: Toward a Personalized Protocol
Source: PubMed Central journal article supplement (PMC6456820; doi:10.2196/10970), 2019-03-27
Supplement: resprot_v8i3e10970_app3.pdf [file resprot_v8i3e10970_app3.pdf]

**Table 3:** Parameters of muscle performance pre and post training for the patient, which followed the CON and ECC protocol, respectively.

| <b>ECC</b>            | <b>Left Leg PRE</b> | <b>Left Leg POST</b> | <b>Right Leg PRE</b> | <b>Right Leg POST</b> |
|-----------------------|---------------------|----------------------|----------------------|-----------------------|
| <b>Real Power</b>     |                     |                      |                      |                       |
| Average [W]           | 846.79              | 631.88               | 911.99               | 836.40                |
| PEAK [W]              | 1204.45             | 899.92               | 1317.81              | 1257.36               |
| tPEAK [sec]           | 0.15                | 0.14                 | 0.20                 | 0.15                  |
| <b>Reactive Power</b> |                     |                      |                      |                       |
| Average [W]           | 172.31              | 152.19               | 178.47               | 251.91                |
| PEAK [W]              | 952.04              | 973.89               | 1047.57              | 1415.40               |
| tPEAK [sec]           | 0.42                | 0.43                 | 0.53                 | 0.51                  |
| <b>Training Load</b>  |                     |                      |                      |                       |
| Average [kg]          | 43.30               | 60.93                | 43.66                | 59.93                 |
| <b>Training Power</b> |                     |                      |                      |                       |
| Average [W]           | 171.09              | 180.63               | 166.77               | 163.88                |
| <b>Positive Work</b>  |                     |                      |                      |                       |
| Average [W]           | 2.27                | 2.27                 | 2.13                 | 2.23                  |
| <b>Negative Work</b>  |                     |                      |                      |                       |
| Average [W]           | 7.95                | 8.53                 | 7.83                 | 7.57                  |
| <br>                  |                     |                      |                      |                       |
| <b>CON</b>            | <b>Left Leg PRE</b> | <b>Left Leg POST</b> | <b>Right Leg PRE</b> | <b>Right Leg POST</b> |
| <b>Real Power</b>     |                     |                      |                      |                       |
| Average [W]           | 780.33              | 1165.33              | 864.93               | 1158.30               |
| PEAK [W]              | 964.00              | 1190.20              | 1072.70              | 1214.20               |
| tPEAK [sec]           | 0.13                | 0.13                 | 0.16                 | 0.15                  |
| <b>Reactive Power</b> |                     |                      |                      |                       |
| Average [W]           | 998.65              | 1513.48              | 968.75               | 1542.33               |
| PEAK [W]              | 1327.10             | 1604.10              | 1286.60              | 1575.30               |
| tPEAK [sec]           | 0.75                | 0.50                 | 0.76                 | 0.53                  |
| <b>Training Load</b>  |                     |                      |                      |                       |
| Average [kg]          | 42.07               | 46.89                | 37.09                | 48.01                 |
| <b>Training Power</b> |                     |                      |                      |                       |
| Average [W]           | 104.07              | 107.52               | 101.50               | 112.66                |
| <b>Positive Work</b>  |                     |                      |                      |                       |
| Average [W]           | 4.78                | 5.11                 | 4.72                 | 5.41                  |
| <b>Negative Work</b>  |                     |                      |                      |                       |
| Average [W]           | 1.45                | 1.35                 | 1.31                 | 1.32                  |
